# Supplementary material
Source: PubMed Central journal article supplement (PMC3752249)
Supplement: 1304575110_pnas.201304575SI.pdf [file 1304575110_pnas.201304575SI.pdf]

# Supporting Information

McCord et al. 10.1073/pnas.1304575110

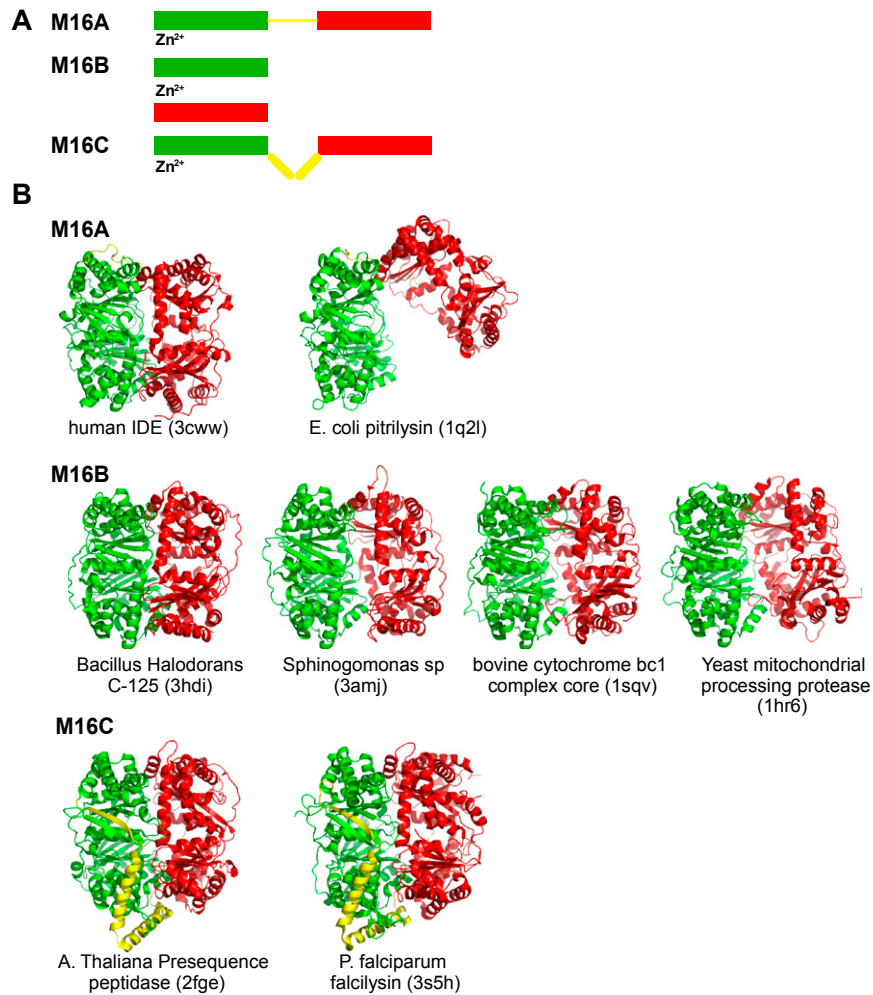

**Fig. S1.** M16 family. (A) Schematic diagram of M16A, M16B, and M16C protein. The green and red domains are roughly 45–50 kDa. In M16A and M16C, the green and red domains represent the N- and C-terminal halves of the metalloprotease joined by the linker (yellow). In M16B, these two domains are encoded by two different genes. (B) Structure comparison of the M16 family of proteases. Only representative structures with different degrees of opening between the two domains are shown, particularly for the M16B family.

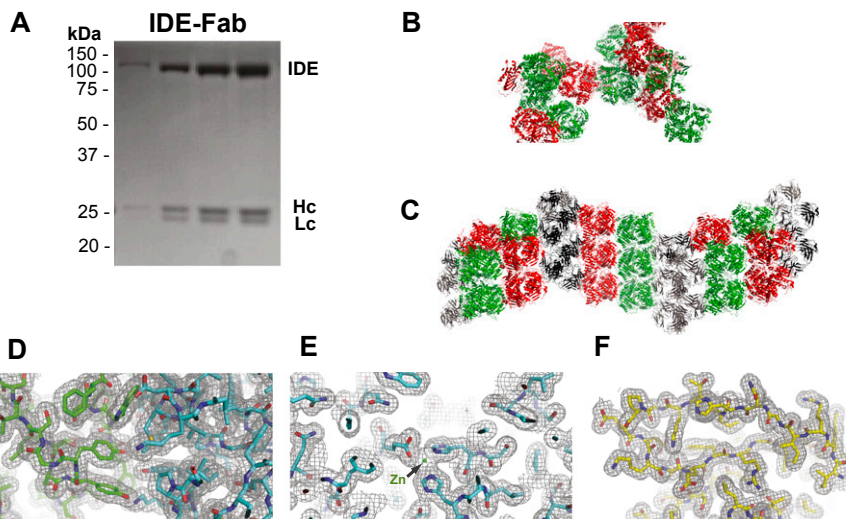

**Fig. 52.** Basic features of insulin degrading enzyme (IDE)-Fab<sub>(IDE)</sub> complex and crystal structure. (A) IDE and Fab<sub>(IDE)</sub> protein were incubated at an equal molar ratio and run on an S200 column, then subsequently electrophoresed by 15% SDS/PAGE conditions. Each lane presents a single band at ~110 kDa, representative of IDE, and a double band at 25 kDa, indicating the presence of the heavy (Hc) and light (Lc) chains forming a Fab<sub>(IDE)</sub> molecule. (B and C) Comparison of crystal packing of IDE dimer (B) with Fab<sub>(IDE)</sub>-bound IDE dimer (C). Two IDE monomers in IDE dimer are colored as red and green, and two Fab proteins are shown as black and gray. (D–F) Electron density maps (2Fo–Fc at 1.0  $\sigma$ ) of representative regions of IDE-Fab<sub>(IDE)</sub>, including the (D) IDE chain A (blue) and Fab heavy chain (green) binding interface; (E) IDE chain A catalytic region (blue; green, Zn<sup>2+</sup> atom); and (F) IDE chain B (yellow) base subdomain.

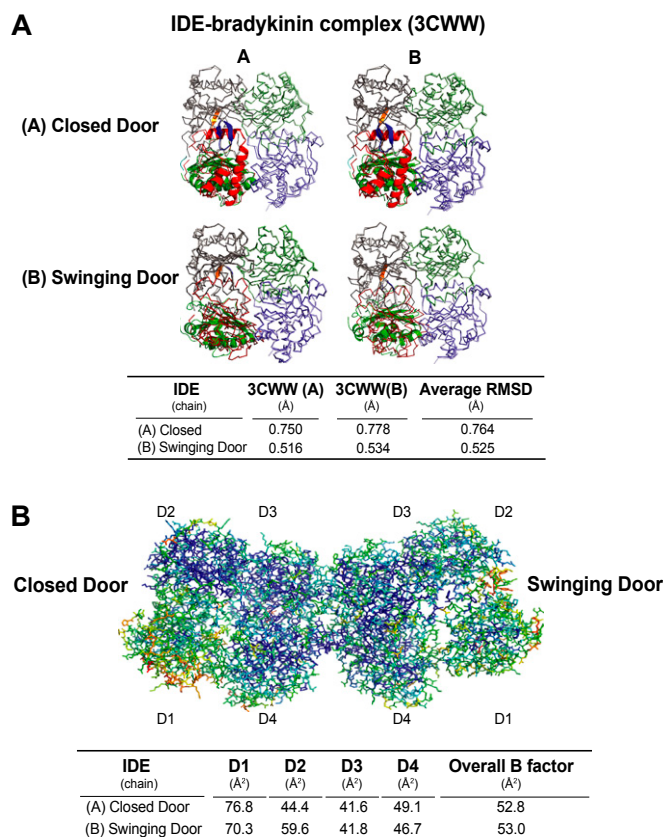

**Fig. 53.** Overall structural analysis of IDE in IDE-Fab<sub>(IDE)</sub> complex. (A) Superimposition of chain A and B of IDE within IDE-Fab<sub>(IDE)</sub> with the closed door state of IDE (Protein Data Bank ID 3cww). (B) Thermal B factors of IDE D1–D4 domains in chain A and B of IDE.

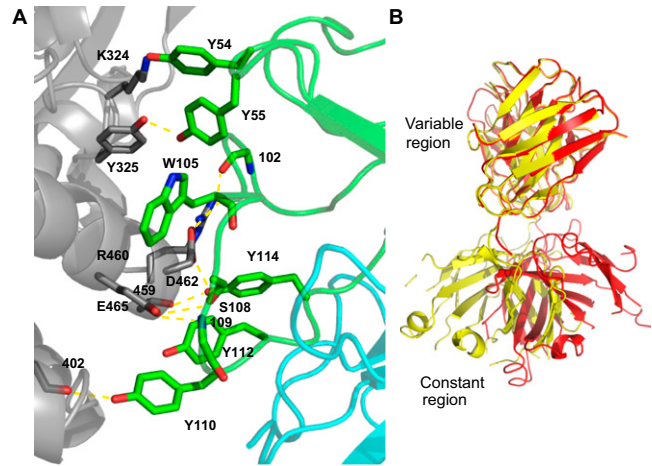

**Fig. 54.** IDE-Fab interaction. (A) Detailed interaction between the heavy chain of IDE-Fab with the D2 domain of IDE. The heavy and light chains of IDE-Fab are colored in green and cyan, respectively, and IDE D2 domain is shown in gray. (B) Superimposition of two IDE-Fab molecules, one that binds IDE closed door and one that binds IDE in the swinging door state, to reveal the rigid body movement of the constant region of two Fab molecules relative to the variable region.

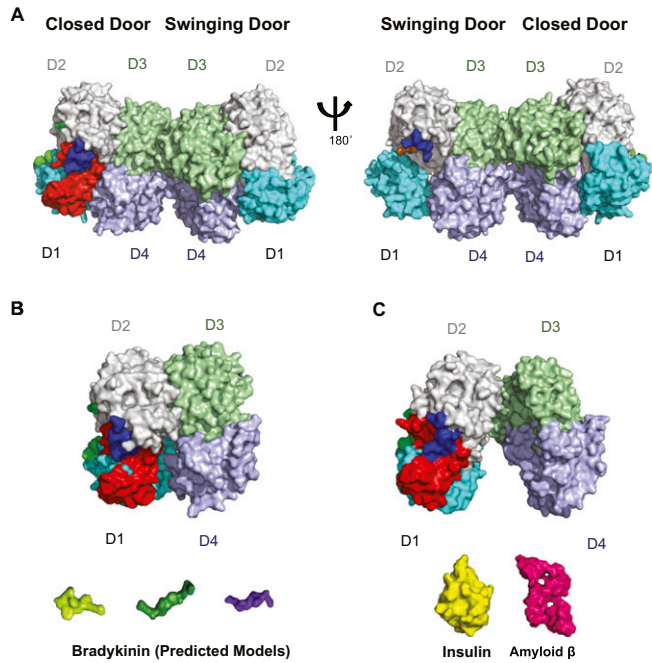

**Fig. 55.** Surface representation of IDE. (A) IDE dimer displaying the (A) closed door and (B) swinging door states. Dimer is rotated 180° to visualize the domain 1 (D1) differences between the two varying states. It is worth noting that the missing door subdomain in the swinging door state is not artificially incorporated into the representation in this figure when comparing with Fig. 2 E and F. We hypothesize that the door is present but disordered in our structure. Thus, IDE in the swinging door states has much smaller opening than what is depicted in this representation. (B) Putative door domain in the swinging door state is placed to show the 11- to 18-Å opening of the IDE catalytic chamber in the swinging door state, with three predicted models of bradykinin (helical, yellow;  $\beta$ -sheet, green; loop, purple) shown to illustrate potential small peptide degradation (i.e., bradykinin). (C) The D2/D3 pivot state of IDE, as predicted from small angle X-ray scattering (SAXS) data, is modeled to illustrate a catalytic chamber opening large enough to accommodate larger peptide degradation (i.e., insulin or amyloid  $\beta$ ).

**A**

| Species<br>(Identifier)  | Identity to Human<br>(%) | P-loop<br>(284 - 298 a.a.)                                            |
|--------------------------|--------------------------|-----------------------------------------------------------------------|
| Human (P14735)           | 100.0                    | 274 LFSEVENKNV <b>ELPEFPEH</b> --- <b>PFQ</b> ----- <b>EEHLKQ</b> 300 |
| Rhesus macaque (H9F951)  | 99.1                     | 271 LFSEVENKSV <b>ELPEFPEH</b> --- <b>PFQ</b> ----- <b>EEHLKQ</b> 297 |
| Bovine (Q24K02)          | 98.8                     | 274 LFSEVENKNV <b>ELPEFPEH</b> --- <b>PFQ</b> ----- <b>EEHLKQ</b> 300 |
| Rabbit (G1SIE8)          | 98.1                     | 274 LFSEVENKNV <b>ELPEFPEH</b> --- <b>PFQ</b> ----- <b>EEHLRQ</b> 300 |
| Giant Panda (G1M612)     | 96.5                     | 274 LFSEVENKNV <b>ELPEFPEH</b> --- <b>PFQ</b> ----- <b>EEHLKQ</b> 300 |
| Pig (F1SC98)             | 95.6                     | 245 LFSEVENKNV <b>ELPEFPEH</b> --- <b>PFQ</b> ----- <b>EEHLRQ</b> 271 |
| Rat (P35559)             | 95.5                     | 274 LFSEVENKNV <b>ELPEFPEH</b> --- <b>PFQ</b> ----- <b>EEHLKQ</b> 300 |
| Mouse (Q9JHR7)           | 95.0                     | 274 LFSEVENKNV <b>ELPEFPEH</b> --- <b>PFQ</b> ----- <b>EEHLRQ</b> 300 |
| Zebrafish (A5A8J7)       | 85.7                     | 253 LFGEVENKNV <b>VEVEFPTH</b> --- <b>PFQ</b> ----- <b>EEHLRQ</b> 279 |
| Fruit Fly (P22817)       | 44.3                     | 247 KFSEIENKNV <b>KVGVWRH</b> --- <b>EYA</b> ----- <b>EERYGQ</b> 273  |
| Tomato (K4BQ70)          | 36.8                     | 234 KFQDIRNIDR <b>NIHFTGQ</b> --- <b>FCI</b> ----- <b>MEHLQI</b> 260  |
| Mouse ear-cress (F4J3D9) | 32.9                     | 304 LFGQIRNTN <b>QGIERFPGQ</b> --- <b>ECT</b> ----- <b>LDHLQV</b> 304 |
| Slime Mold (F4PTN0)      | 26.8                     | 233 YFASIKNKNI <b>EYERFAL</b> --- <b>SLP</b> ----- <b>QG--GT</b> 255  |
| Pitriylisin (P05458)     | 24.7                     | 251 TFGRVNPKES <b>KKFEITVP</b> --- <b>VVT</b> ----- <b>DAQKGI</b> 275 |
| Yeast (P40851)           | 17.8                     | 244 KFGDIKPKSA <b>VKERSISIRTSFRRSKSLKKRQDSS</b> 293                   |

**B**

| Species<br>(Identifier)  | Identity to Human<br>(%) | G-loop<br>(361 - 369 a.a.)                      |
|--------------------------|--------------------------|-------------------------------------------------|
| Human (P14735)           | 100.0                    | 342 GPGSLLSELKSGWVNTLV <b>GGQKEGARGF</b> - 370  |
| Rhesus macaque (H9F951)  | 99.1                     | 339 GPGSLLSELKSGWVNTLV <b>GGQKEGARGF</b> - 367  |
| Bovine (Q24K02)          | 98.8                     | 342 GPGSLLSELKSGWVNTLV <b>GGQKEGARGF</b> - 370  |
| Rabbit (G1SIE8)          | 98.1                     | 342 GPGSLLSELKSGWVNTLV <b>GGQKEGARGF</b> - 370  |
| Giant Panda (G1M612)     | 96.5                     | 342 GPGSLLSELKSGWVNTLV <b>GGQKEGARGF</b> - 370  |
| Pig (F1SC98)             | 95.6                     | 313 GPGSLLSELKSGWVNTLV <b>GGQKEGARGF</b> - 341  |
| Rat (P35559)             | 95.5                     | 342 GPGSLLSELKSGWVNTLV <b>GGQKEGARGF</b> - 370  |
| Mouse (Q9JHR7)           | 95.0                     | 342 GPGSLLSELKSGWVNTLV <b>GGQKEGARGF</b> - 370  |
| Zebrafish (A5A8J7)       | 85.7                     | 321 GPGSLLSELKSGWVNTLV <b>GGQKEGARGF</b> - 349  |
| Fruit Fly (P22817)       | 44.3                     | 315 GKGSILSELRRLLGWCNDL <b>MAHONTQNGF</b> - 343 |
| Tomato (K4BQ70)          | 36.8                     | 302 GEGSLFYVKKLGWATSL <b>SAGEADSWTNEF</b> - 330 |
| Mouse ear-cress (F4J3D9) | 32.9                     | 304 GEGSLFHALKILGWATGL <b>YAGEADWSMEY</b> - 329 |
| Slime Mold (F4PTN0)      | 26.8                     | 303 SRGSLFVLKAEDLAYS <b>SLVSGPLPLQETV</b> - 331 |
| Pitriylisin (P05458)     | 24.7                     | 319 SPGTLSDWLQKQLV <b>EGISANSDPVNGNS</b> 349    |
| Yeast (P40851)           | 17.8                     | 321 SPGSLSYLLASKGWL <b>TGCFAPTSEFAIGD</b> - 349 |

**C**

| Species<br>(Identifier)  | Identity to Human<br>(%) | H-loop<br>(490 - 500 a.a.)                                                                                  |
|--------------------------|--------------------------|-------------------------------------------------------------------------------------------------------------|
| Human (P14735)           | 100.0                    | 482 SKSFEGK----- <b>TDREEWYGTQYK</b> QEAI <b>P</b> DEV <b>IKK</b> WQN 515                                   |
| Rhesus macaque (H9F951)  | 99.1                     | 479 SKSFEGK----- <b>TDREEWYGTQYK</b> QEAI <b>P</b> DEV <b>IKK</b> WQN 512                                   |
| Bovine (Q24K02)          | 98.8                     | 482 SKSFEGK----- <b>TDREEWYGTQYK</b> QEAI <b>P</b> DEV <b>IKK</b> WQN 515                                   |
| Rabbit (G1SIE8)          | 98.1                     | 482 SKSFEGK----- <b>TDREEWYGTQYK</b> QEAI <b>P</b> DEV <b>IKK</b> WQN 515                                   |
| Giant Panda (G1M612)     | 96.5                     | 482 SKSFEGK----- <b>TDREEWYGTQYK</b> QEAI <b>P</b> DEV <b>IKK</b> WQN 515                                   |
| Pig (F1SC98)             | 95.6                     | 453 SKSFEGK----- <b>TDREEWYGTQYK</b> QEAI <b>P</b> DEV <b>IKK</b> WQN 486                                   |
| Rat (P35559)             | 95.5                     | 482 SKSFEGK----- <b>TDREEWYGTQYK</b> QEAI <b>P</b> DEV <b>IQ</b> WQN 515                                    |
| Mouse (Q9JHR7)           | 95.0                     | 382 SKSFEGK----- <b>TDREEWYGTQYK</b> QEAI <b>P</b> DEV <b>IQ</b> WQN 515                                    |
| Zebrafish (A5A8J7)       | 85.7                     | 461 SKSFEGQ----- <b>TDREEWYGTQYK</b> QEAI <b>T</b> DEA <b>IKK</b> WDN 494                                   |
| Fruit Fly (P22817)       | 44.3                     | 455 SQSFEPD----- <b>CDLAEFYKTKY</b> G <b>I</b> TRVAK <b>D</b> TVQ <b>S</b> WEN 488                          |
| Tomato (K4BQ70)          | 36.8                     | 442 STKFEGN----- <b>TSMTEFWYGTAY</b> S <b>IE</b> KVGG <b>S</b> IK <b>Q</b> WME 475                          |
| Mouse ear-cress (F4J3D9) | 32.9                     | 421 SNKFEGQ----- <b>TDKVEFWYNTAY</b> S <b>L</b> E <b>K</b> IT <b>K</b> FT <b>IQ</b> EW <b>M</b> Q 449       |
| Slime Mold (F4PTN0)      | 26.8                     | 441 SKSYQ <b>GK</b> ----- <b>TVLIDKYVGEF</b> S <b>K</b> TK <b>V</b> ED <b>D</b> VAR <b>W</b> KS 474         |
| Pitriylisin (P05458)     | 24.7                     | 459 SPKEP----- <b>HNKTAYFVDAPY</b> Q <b>V</b> DK <b>IS</b> A <b>Q</b> T <b>F</b> AD <b>W</b> Q <b>K</b> 493 |
| Yeast (P40851)           | 17.8                     | 483 GNIKSGN <b>IFDKMKNKSDICTDFVYEF</b> E <b>F</b> Y <b>TANVHLASDNK</b> F <b>H</b> - 524                     |

Fig. S6. Sequence alignment of IDE domain 1 subdomains for the proline-rich (P) loop (A), glycine-rich (G) loop (B), and hydrophobic residues at the tip (H) loop (C). The protein sequence ID of IDE homologs from mammals, insects, plants, fungi, and bacterium is indicated. Sequence identity is compared with human IDE. Each loop is shown by residues in bold font, whereas the conservation of particular residues is highlighted (blue, P-loop; yellow, G-loop; purple, H-loop).

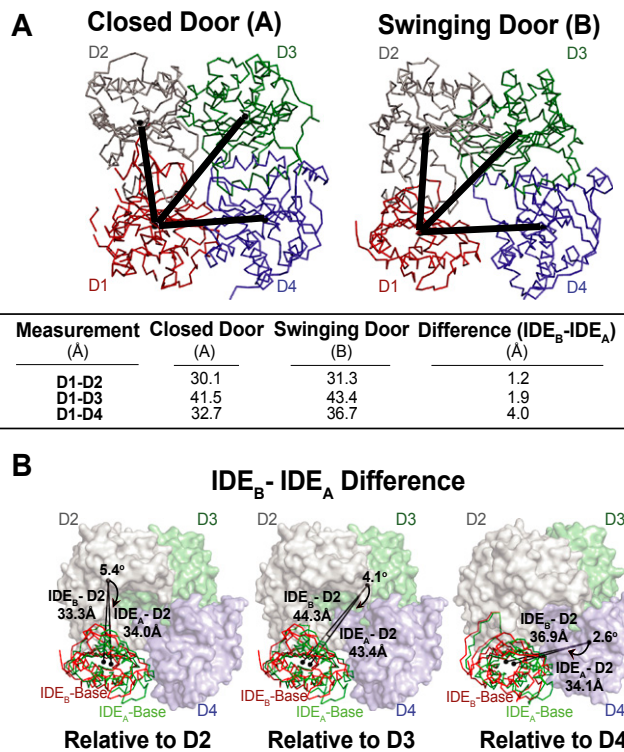

**Fig. S7.** Measurements of rigid body movement of IDE base subdomain using the change in the center of mass (COM) of the base subdomain from COM of D2, D3, and D4 domains of IDE. (A) The COM of each domain and a measurement for length relative to domain 1 (D1) was calculated for the IDE (A) closed door and IDE (B) swinging door states. The measurement differences between the two states are recorded as the swinging door state minus the closed door state, IDE<sub>B</sub>-IDE<sub>A</sub>. (B) The swinging door state base was superimposed to the closed door state IDE chain, and the COM of the base for both IDE states was used to determine the difference in length and angle measurements relative to each of the D2, D3, and D4 domains.

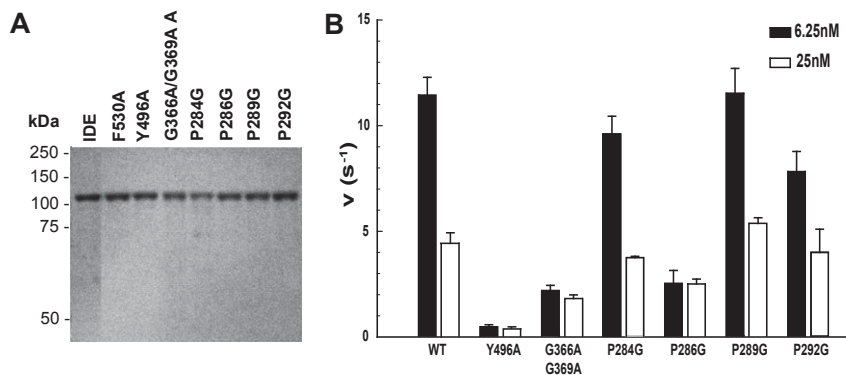

**Fig. S8.** Analysis of IDE purification and catalytic activities of IDE mutants. (A) IDE cysteine-free WT and mutant proteins were electrophoresed on 9% SDS/PAGE and subsequently stained by Coomassie Blue. Each lane represents 1  $\mu$ g of fully purified protein, and each lane presents a single dominant band at  $\sim$ 110 kDa. (B) Relative activities of IDE (WT) and IDE mutants within the H-loop (Y496A), G-loop (G366A/G369A), and P-loop (P284G, P286G, P289G, P292G) at enzyme concentrations of 6.25 (black) and 25 (striped) nM. Activity was followed by measuring fluorescence resulting from the cleavage of 0.5  $\mu$ M Substrate V at 37  $^{\circ}$ C. Background values were subtracted from experimental data and then plotted, a linear regression line was obtained for each respective protein at both concentrations ( $R^2 > 95\%$ ). The corresponding slope ( $m$ ,  $y = mx + b$ ), along with the maximum fluorescence reading for IDE at the end of the measurement and the concentration of substrate (500 pmol) and IDE (6.25 or 25 pmol), were used to calculate a specific activity. Data demonstrates mean  $\pm$  SD from at least three experiments.

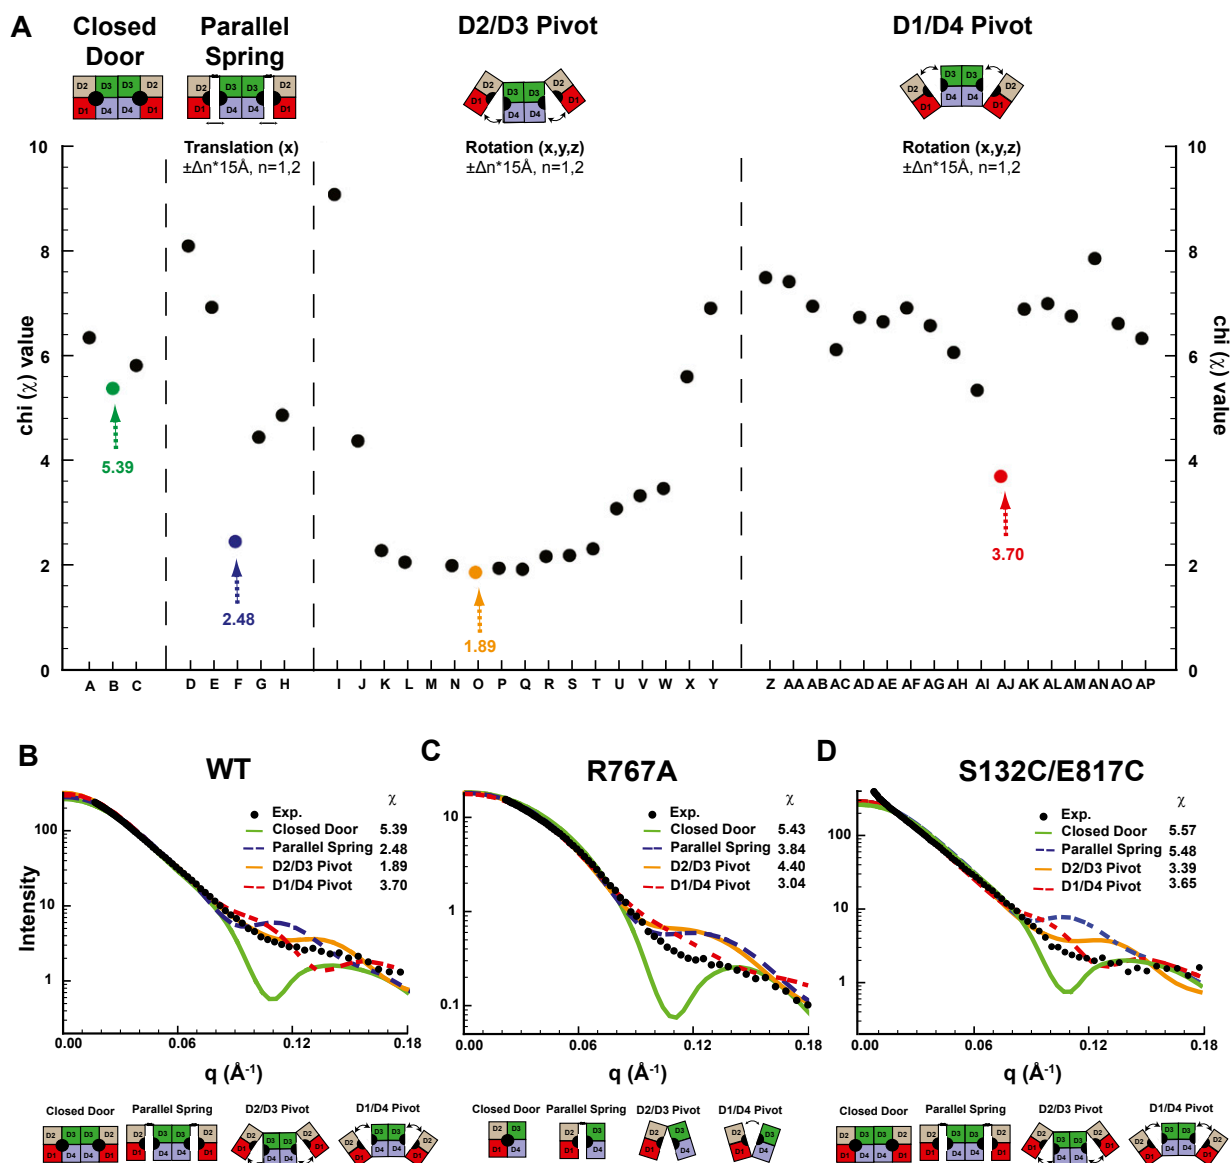

**Fig. S9.** SAXS Analysis of IDE and mutants in solution. (A) Proposed models of WT IDE in solution with altered degrees of openness, created using models of closed door or swinging door states (A–C), parallel spring with different degree of translation for the opening of the catalytic chamber (D–H), D2/D3 pivot with different rotations in the x, y, and z planes (I–Y), and D1/D4 pivot with different rotations in the x, y, and z planes (Z–AP). The lowest  $\chi$  value, and thus highest statistical likelihood of fit, for each particular model is distinctly colored and was subsequently used for analysis. (B–D) SAXS scattering profiles of WT IDE (B), R767A (C), and S132C/E817C (D). Curve fitting is based on atomic models using the ATSAS CRYSOLOG program, such that black circles represent experimental data for IDE and solid lines display the various theoretical fits. WT IDE and S132C/E817C IDE, the disulfide bound cross-linked mutant, were fit using the dimer state with both chains in the respective model, whereas R767A IDE, the monomerized mutant, was fit using the proposed models in a monomer state. Chi values ( $\chi$ ) are shown to express the discrepancy between the experimental data and theoretical fits. A protein concentration of 1 mg/mL was used for the calculation of all scattering profiles, and the diagrams represent the proposed theoretical models of IDE in solution.

**Table S1. Crystallographic statistics of IDE-Fab(IDE) complex**

| Variable                          | IDE-Fab                                                                    |
|-----------------------------------|----------------------------------------------------------------------------|
| Crystallization condition         |                                                                            |
| IDE-Fab crystallized at 5 mg/mL   | 0.1 M sodium cacodylate, pH 6.5<br>0.2 M MgCl <sub>2</sub><br>10% PEG-3000 |
| Data collection                   |                                                                            |
| Beam line                         | APS-19ID                                                                   |
| Wavelength (Å)                    | 0.9792                                                                     |
| Space group                       | P2 <sub>1</sub> 2 <sub>1</sub> 2 <sub>1</sub>                              |
| Cell dimension (Å)                |                                                                            |
| <i>a</i>                          | 56.96                                                                      |
| <i>b</i>                          | 131.65                                                                     |
| <i>c</i>                          | 377.02                                                                     |
| α                                 | 90                                                                         |
| β                                 | 90                                                                         |
| γ                                 | 90                                                                         |
| Resolution (Å)                    | 50–3.36                                                                    |
| R <sub>sym</sub> (%) <sup>*</sup> | 11.8 (68.8) <sup>†</sup>                                                   |
| I/σ                               | 14.1 (3.2) <sup>†</sup>                                                    |
| Redundancy <sup>‡</sup>           | 5.6 (5.6) <sup>†</sup>                                                     |
| Completeness (%)                  | 99.9 (100) <sup>†</sup>                                                    |
| Unique reflections                | 41,849                                                                     |
| Refinement                        |                                                                            |
| R <sub>work</sub> <sup>§</sup>    | 0.2322                                                                     |
| R <sub>free</sub> <sup>¶</sup>    | 0.2803                                                                     |
| No. atoms                         |                                                                            |
| Protein                           | 20,933                                                                     |
| rmsd                              |                                                                            |
| Bond lengths (Å)                  | 0.006                                                                      |
| Bond angles (°)                   | 1.578                                                                      |
| Ramachandran plot (%)             |                                                                            |
| Favorable region                  | 88.6                                                                       |
| Allowed region                    | 11.4                                                                       |
| Generously allowed region         | 0                                                                          |
| Disallowed region                 | 0                                                                          |
| Protein Data Bank ID              | 4IOF                                                                       |

<sup>\*</sup> $R_{\text{sym}} = \sum_j (|I_j| - \langle I \rangle) / \sum_j \langle I \rangle$ , where  $I_j$  is the intensity of the  $j^{\text{th}}$  reflection and  $\langle I \rangle$  is the average intensity.

<sup>†</sup>Outer resolution shell.

<sup>‡</sup> $N_{\text{obs}} / N_{\text{unique}}$ .

<sup>§</sup> $R_{\text{work}} = \sum_{\text{hkl}} |F_{\text{obs}} - F_{\text{calc}}| / \sum_{\text{hkl}} F_{\text{obs}}$ .

<sup>¶</sup> $R_{\text{free}}$ , calculated the same as  $R_{\text{work}}$ , but on the 5% data excluded from refinement calculation.
